# Supplementary material for: The use of the core–shell structure of zero-valent iron nanoparticles (NZVI) for long-term removal of sulphide in sludge during anaerobic digestion
Source: Royal Society of Chemistry journal article supplement (doi:10.1039/c5em00470e), 2015-01-01
Supplement: c5em00470e1.pdf [file c5em00470e1.pdf]

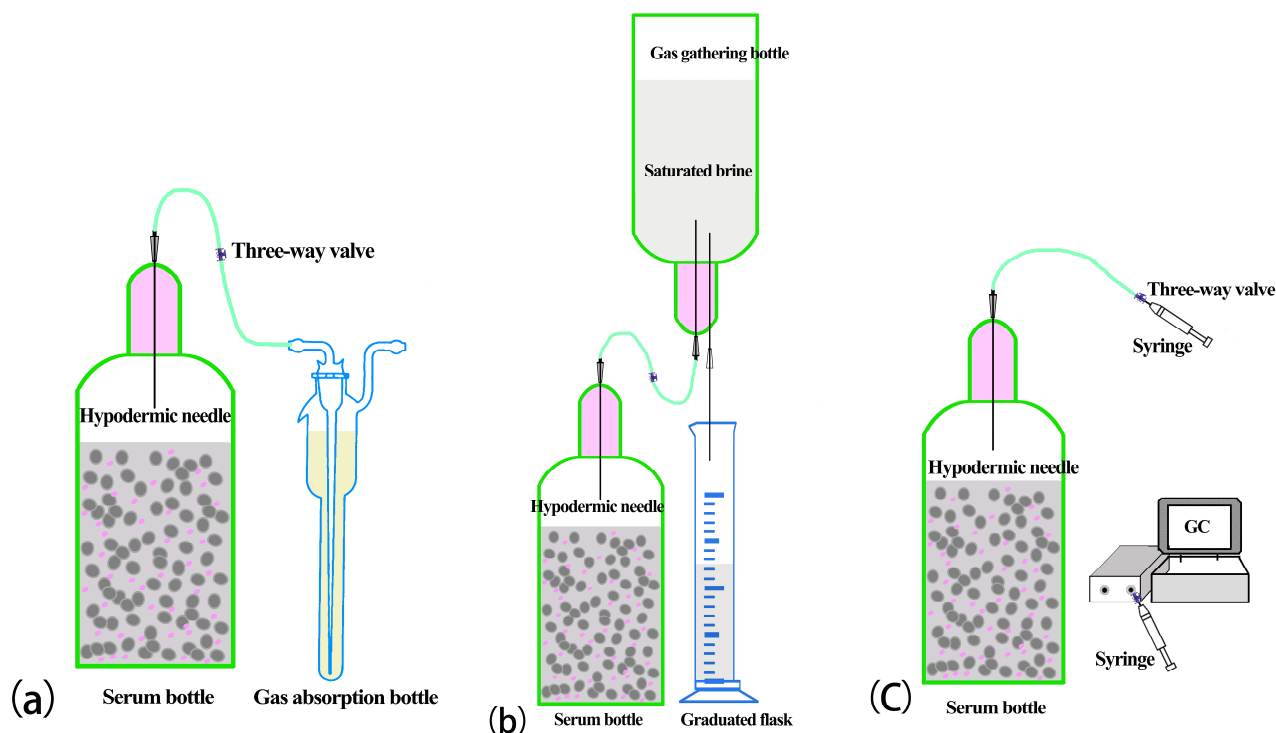

Fig. S1 Determinations of hydrogen sulphide (a), biogas volume (b) and biogas composition(c)

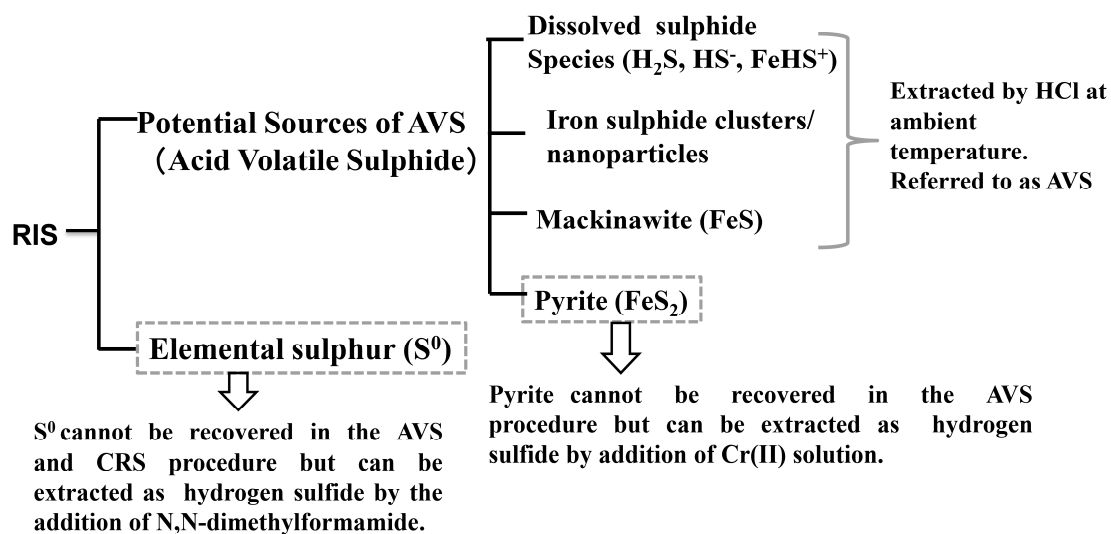

Fig. S2 Analysis of the extractable reduced inorganic sulphur (RIS)
